# Supplementary material
Source: MDPI journal article supplement (https://www.mdpi.com/1999-4893/13/8/192)
Supplement: s1 [file s1]

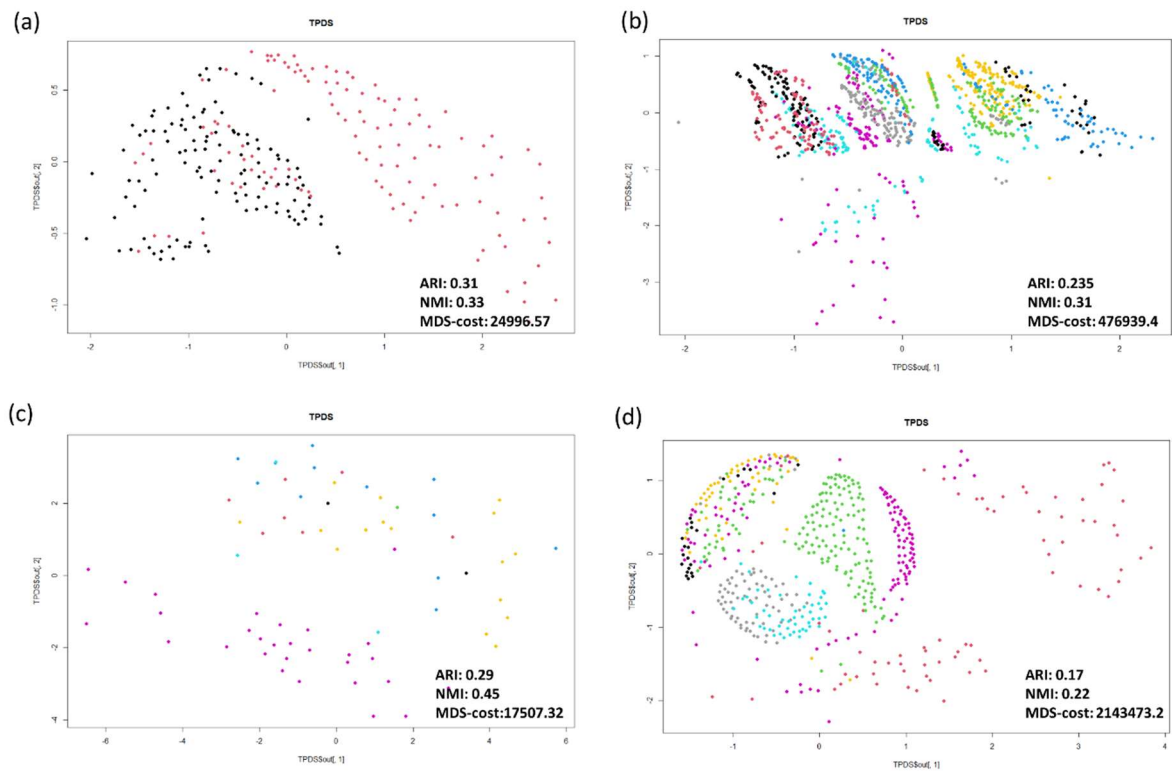

Supplementary Figure 1: The results of TPDS on 4 data-sets when SOM was used with hexagonal geometry. (a) Parkinson's data-set (b) protein expression data-set (c) SCADI data (d) single-cell expression.

Supplementary Table-1 : Parameters and time taken by TPDS for optimal solution for different data-sets

| Data-sets              | SOM grid size | Lambda | SVD decomposition | Time taken   |
|------------------------|---------------|--------|-------------------|--------------|
| Parkinson's            | 2 X 2         | 1      | True              | 5.6 second   |
| Protein expression     | 5 X 5         | 1      | True              | 2.86 minutes |
| SCADI                  | 7 X 71        | 1      | FALSE             | 1.26 second  |
| Single-cell expression | 3 X 3         | 1      | True              | 14 minutes   |
